# Supplementary material for: Involvement of HIF-1α in the Detection, Signaling, and Repair of DNA Double-Strand Breaks after Photon and Carbon-Ion Irradiation
Source: MDPI journal article supplement (doi:10.3390/cancers13153833), 2021-07-30
Supplement: s1 [file s1]

## Supplementary text

### **HIF-1 $\alpha$ does not increase ATM and DNA-PKcs levels but induces their phosphorylation**

First, we investigated whether the effects of the silencing of HIF-1 $\alpha$  on the DSB detection and the activation of the NHEJ-c pathway resulted from the phosphorylation of the ATM and DNA-PKcs proteins or an important recruitment of these proteins. The expressions of ATM and DNA-PKcs, as well as of their phosphorylated forms (P-ATM and P-DNA-PKcs), were followed by Western-blot for SQ20B<sup>CD44Low</sup>, SQ20B-CSCs, FaDu<sup>CD44Low</sup>, and FaDu-CSCs cells, in response to photon and C-ion irradiations, under normoxia and hypoxia, after the silencing or not of HIF-1 $\alpha$  (Supplementary Figure S1). The expressions of the total amount of the ATM and DNA-PKcs proteins were quantified and normalized to actin for all the conditions tested (Supplementary Figure S2). Altogether, these quantifications underline that the recruitments of the ATM and DNA-PKcs proteins were not affected by the experimental conditions for the four populations. However, variations of P-ATM and P-DNA-PKcs were displayed starting 30 minutes after irradiation. Since ATM and DNA-PKcs proteins are constitutively expressed, respectively in the cytoplasm and the plasma membrane, the variations of the phosphorylation observed by Western-blot could not be specific from the DSB repair process into the nucleus. Consequently, the phosphorylation of ATM and DNA-PKcs studied by Western-blot are indicative but not specific from the DNA-repair process. To investigate the specific role of HIF-1 $\alpha$  on the DNA-repair, we then determined the kinetics of induction and repair of the DSBs by fluorescent microscopy only into the cell nucleus, where DSBs are induced by irradiation.
